# Supplementary material
Source: MDPI journal article supplement (https://www.mdpi.com/2073-4344/13/6/964)
Supplement: s1 [file s1]

## Supplementary Materials

for

# Effect of ruthenium modification of g-C<sub>3</sub>N<sub>4</sub> in the visible-light-driven photocatalytic reduction of Cr(VI)

Truong Nguyen Xuan <sup>1</sup>, Dien Nguyen Thi <sup>1</sup>, Tue Nguyen Ngoc <sup>1</sup>, Khanh Dang Quoc <sup>2</sup>, Miklós Németh <sup>3</sup>, Shoaib Mukhtar <sup>4</sup>, and Ottó Horváth <sup>4,\*</sup>

<sup>1</sup> School of Chemical Engineering, Hanoi University of Science and Technology, No.1 Dai Co Viet street, Hai Ba Trung distric, Hanoi 100000, Vietnam; truong.nguyenxuan@hust.edu.vn (T.N.X.); dien.nt212318m@sis.hust.edu.vn (D.N.T.); tue.nguyenngoc@hust.edu.vn (T.N.N.);

<sup>2</sup> School of Materials Science and Engineering, Hanoi University of Science and Technology, No.1 Dai Co Viet street, Hai Ba Trung distric, Hanoi 100000, Vietnam; khanh.dangquoc@hust.edu.vn

<sup>3</sup> Centre for Energy Research, Surface Chemistry and Catalysis Department, H-1121, Konkoly-Thege street 29-33, Budapest, Hungary; nemeth.miklos@ek-cer.hu

<sup>4</sup> Research Group of Environmental and Inorganic Photochemistry, Center for Natural Sciences, Faculty of Engineering, University of Pannonia, P.O.B. 1158, Veszprém H-8210, Hungary; shoaibmukht131@gmail.com (S.M.)

\* Correspondence: horvath.otto@mk.uni-pannon.hu (O.H.); Tel+36-88-624-000 / 6049 ext.

**Table S1.** Surface atomic concentrations (%) of g-C<sub>3</sub>N<sub>4</sub> and Ru/g-C<sub>3</sub>N<sub>4</sub> catalysts from XPS analysis.

|                       | <b>g-C<sub>3</sub>N<sub>4</sub></b> | <b>Ru/g-C<sub>3</sub>N<sub>4</sub></b> |
|-----------------------|-------------------------------------|----------------------------------------|
| <b>C 1s</b>           | 40.7                                | 44.4                                   |
| <b>Ca 2p</b>          | 1.1                                 | 0.4                                    |
| <b>N 1s</b>           | 53.9                                | 45.8                                   |
| <b>Na 1s</b>          | 0.1                                 | 0.2                                    |
| <b>O 1s</b>           | 4.3                                 | 7.8                                    |
| <b>Ru 3d &amp; 3p</b> | -                                   | 1.4                                    |

**Table S2.** Comparison of Cr(VI) photocatalytic reduction efficiencies (%) with various catalysts and experimental conditions.

| Catalyst                                                                               | Light source                            | Catalyst dosage (g L <sup>-1</sup> ) | C <sub>Cr(VI)</sub> (mg L <sup>-1</sup> ) | Cr(VI) reduction efficiency (%) | Time (min) | Ref.      |
|----------------------------------------------------------------------------------------|-----------------------------------------|--------------------------------------|-------------------------------------------|---------------------------------|------------|-----------|
| acid-base modified g-C <sub>3</sub> N <sub>4</sub>                                     | 500W Xe with filter, $\lambda > 420$ nm | 0.75                                 | 20                                        | 75                              | 120        | [18]      |
| Ag/g-C <sub>3</sub> N <sub>4</sub>                                                     | 28W LED visible                         | 1.0                                  | 20                                        | 64                              | 120        | [38]      |
| TiO <sub>2</sub> -C-SO <sub>3</sub> H                                                  | 300W Xe                                 | 1.0                                  | 10                                        | 98                              | 120        | [39]      |
| Ag/TiO <sub>2</sub>                                                                    | solar radiation                         | 2.0                                  | 10                                        | 75                              | 50         | [40]      |
| HO-g-C <sub>3</sub> N <sub>4</sub>                                                     | 360W Xe with filter, $\lambda > 420$ nm | 1.0                                  | 20                                        | 70                              | 120        | [41]      |
| porous g-C <sub>3</sub> N <sub>4</sub>                                                 | 300W Xe with filter, $\lambda > 420$ nm | 0.1                                  | 25                                        | 85                              | 120        | [42]      |
| CoS <sub>2</sub> /g-C <sub>3</sub> N <sub>4</sub>                                      | 350W Xe with filter, $\lambda > 420$ nm | 0.5                                  | 20                                        | 99                              | 120        | [20]      |
| Cu <sub>2</sub> O/g-C <sub>3</sub> N <sub>4</sub>                                      | 500W Xe with filter, $\lambda > 400$ nm | 0.4                                  | 20                                        | 78                              | 120        | [25]      |
| Cu <sub>3.21</sub> Bi <sub>y4.79</sub> S <sub>2</sub> /g-C <sub>3</sub> N <sub>4</sub> | 28W LED visible                         | 0.25                                 | 10                                        | 93                              | 60         | [21]      |
| Ru/g-C <sub>3</sub> N <sub>4</sub>                                                     | 500W Hg with filter, $\lambda > 400$ nm | 1.0                                  | 20                                        | 97                              | 120        | This work |
